# Supplementary material for: Topography significantly influencing low flows in snow-dominated watersheds
Source: Copernicus journal article supplement (doi:10.5194/hess-2017-560), 2017-10-10
Supplement: Supplementary file 1 [file hess-2017-560-supplement.pdf]

## Supplementary materials

for

### **Topography significantly influencing low flows in snow-dominated watersheds**

Qiang Li<sup>1</sup>, Xiaohua Wei<sup>1</sup>, Xin Yang<sup>2, 3, 4\*</sup>, Krysta Giles-Hansen<sup>1</sup>, Mingfang Zhang<sup>5</sup>,  
Wenfei Liu<sup>6</sup>

<sup>1</sup>Department of Earth, Environmental and Geographic Sciences, University of British Columbia (Okanagan campus), 1177 Research Road, Kelowna, British Columbia, Canada, V1V 1V7

<sup>2</sup>Key Laboratory of Virtual Geographic Environment (Nanjing Normal University), Ministry of Education, Nanjing, 210023, China

<sup>3</sup>State Key Laboratory Cultivation Base of Geographical Environment Evolution (Jiangsu Province), Nanjing, 210023, China

<sup>4</sup>Jiangsu Center for Collaborative Innovation in Geographical Information Resources Development and Application, Nanjing, 210023, China

<sup>5</sup>School of Resources and Environment, University of Electronic Science and Technology of China, Chengdu, China

<sup>6</sup>Institute of Ecology and Environmental Science, Nanchang Institute of Technology, Nanchang, China

*Correspondence to:* Xin Yang (Email: [xxinyang@163.com](mailto:xxinyang@163.com))

## Table of Contents

|                                                                                           |    |
|-------------------------------------------------------------------------------------------|----|
| 1. Description of the study watersheds .....                                              | 5  |
| 2. Leaf area index (LAI) .....                                                            | 9  |
| 3. Summaries of Kendall correlations between flow variables and topographic indices ..... | 10 |
| 4. An example of the daily flows in the Tulameen River in 1992 .....                      | 18 |
| 5. Linear regression models between flow variables and the sub-set of TIs from FA .....   | 18 |
| 5.1. Model summaries of $Q_{75\%}$ and TIs from 1989 to 1996 .....                        | 19 |
| 5.2. Model summaries of $Q_{90\%}$ and TIs from 1989 to 1996 .....                        | 24 |
| 5.3. Model summaries of $Q_{\min}$ and TIs from 1989 to 1996 .....                        | 29 |
| Reference .....                                                                           | 34 |

## Tables

|                                                                                                                                                                                                                                                                                                                                                                                                             |    |
|-------------------------------------------------------------------------------------------------------------------------------------------------------------------------------------------------------------------------------------------------------------------------------------------------------------------------------------------------------------------------------------------------------------|----|
| Table S1 Watershed number, hydrometric station number, watershed name, and area.                                                                                                                                                                                                                                                                                                                            | 8  |
| Table S2 Coefficients of the Kendall correlation test between the annual mean flow ( $Q_{\text{mean}}$ ) and topographic indices (TIs) from 1989 to 1996. The coefficients in color and in an italic style indicate statistical significance at $p < 0.05$ . The bold TIs with “*” are the sub-set of TIs identified by factor analysis (FA) for further analysis. TI acronyms are defined in Table 1. .... | 11 |
| Table S3 Coefficients of the Kendall correlation test between $Q_{10}$ and topographic indices (TIs) from 1989 to 1996. The coefficients in color and italic style indicate statistical significance $p < 0.05$ . The bold TIs with sign of “*” are the sub-set of TIs identified by factor analysis (FA) to move forward with. TI acronyms are defined in Table 1. ....                                    | 12 |
| Table S4 Coefficients of the Kendall correlation test between $Q_{25}$ and topographic indices (TIs) from 1989 to 1996. The coefficients in color and italic style indicate statistical significance at $p < 0.05$ . The bold TIs with “*” are the sub-set of TIs identified by factor analysis (FA) to move forward with. TI acronyms are defined in Table 1. .                                            | 13 |
| Table S5 Coefficients of the Kendall correlation test between $Q_{50}$ and topographic indices (TIs) from 1989 to 1996. The coefficients in color and italic style indicate                                                                                                                                                                                                                                 |    |

statistical significance at  $p < 0.05$ . The bold TIs with “\*” are the sub-set of TIs identified by factor analysis (FA) to move forward with. TI acronyms are defined in Table 1. . 14

Table S6 Coefficients of the Kendall correlation test between  $Q_{75}$  and topographic indices (TIs) from 1989 to 1996. The coefficients in color and italic style indicate statistical significance at  $p < 0.05$ . The bold TIs with “\*” are the sub-set of TIs identified by factor analysis (FA) to move forward with. TI acronyms are defined in Table 1. . 15

Table S7 Coefficients of the Kendall correlation test between  $Q_{90}$  and topographic indices (TIs) from 1989 to 1996. The coefficients in color and italic style indicate statistical significance at  $p < 0.05$ . The bold TIs with “\*” are the sub-set of TIs identified by factor analysis (FA) to move forward with. TI acronyms are defined in Table 1. . 16

Table S8 Coefficients of the Kendall correlation test between  $Q_{100}$  and topographic indices (TIs) from 1989 to 1996. The coefficients in color and italic style indicate statistical significance at 0.05. The bold TIs with “\*” are the sub-set of TIs identified by factor analysis (FA) to move forward with. TI acronyms are defined in Table 1. . 17

Table S9 The coefficients of determination ( $R^2$ ) of regression models between flow variables and sub-set of TIs in the period of 1989 to 1996. P values of all models are  $< 0.01$ . ..... 19

## Figures

|                                                                                                                                                                                                                                                                        |    |
|------------------------------------------------------------------------------------------------------------------------------------------------------------------------------------------------------------------------------------------------------------------------|----|
| Figure S1. Mean annual precipitation (P), potential evapotranspiration (PET), and temperature (T) in the selected 28 watersheds from 1989 to 1996.....                                                                                                                 | 6  |
| Figure S2 Temporal variation of annual precipitation (P) in the study watersheds. Bars represent one standard deviation from 1989 to 1996. The dotted line represents the average P for the study period. ....                                                         | 7  |
| Figure S3 Temporal variation of the annual potential evapotranspiration (PET) in the study watersheds. Bars represent one standard deviation from 1989 to 1996. The dotted line represents the average PET for the study period. ....                                  | 7  |
| Figure S4 Temporal variation of the annual dryness index (PET/P) in the study watersheds. Bars represent one standard deviation among study watersheds from 1989 to 1996. The dotted line represents the average PET/P across the study period for all watersheds..... | 8  |
| Figure S5 Daily streamflow, $Q_{25\%}$ , and $Q_{75\%}$ of the Tulameen River in 1992. ....                                                                                                                                                                            | 18 |

### 1. Description of the study watersheds

In this study, 28 watersheds located in the Southern Interior of British Columbia, Canada were selected. The watershed name, area, and station number are listed in Table

S1. The temporal variations of the average annual precipitation and potential evapotranspiration among the study watersheds are shown in Figs. S1 to S3.

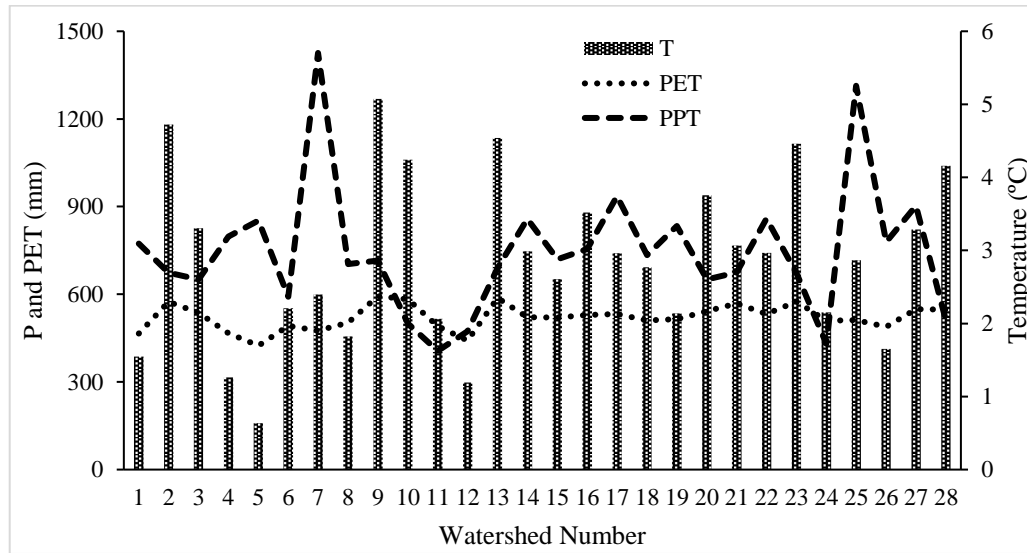

Figure S1. Mean annual precipitation (P), potential evapotranspiration (PET), and temperature (T) in the selected 28 watersheds from 1989 to 1996.

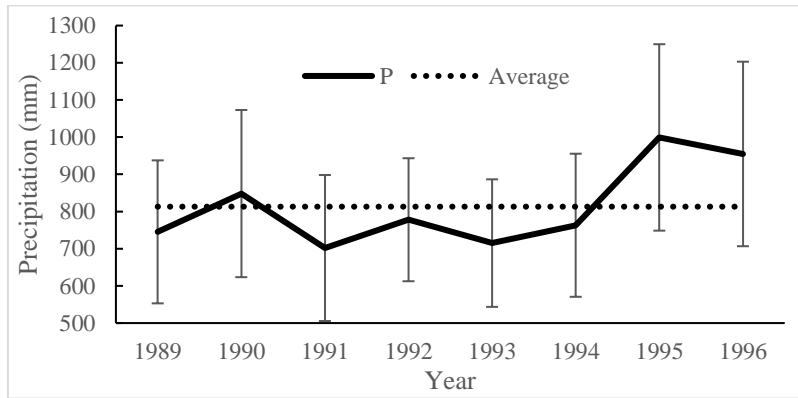

Figure S2 Temporal variation of annual precipitation (P) in the study watersheds. Bars represent one standard deviation from 1989 to 1996. The dotted line represents the average P for the study period.

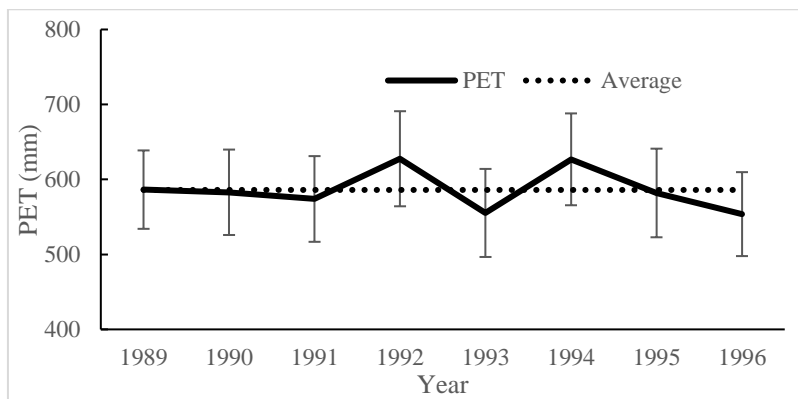

Figure S3 Temporal variation of the annual potential evapotranspiration (PET) in the study watersheds. Bars represent one standard deviation from 1989 to 1996. The dotted line represents the average PET for the study period.

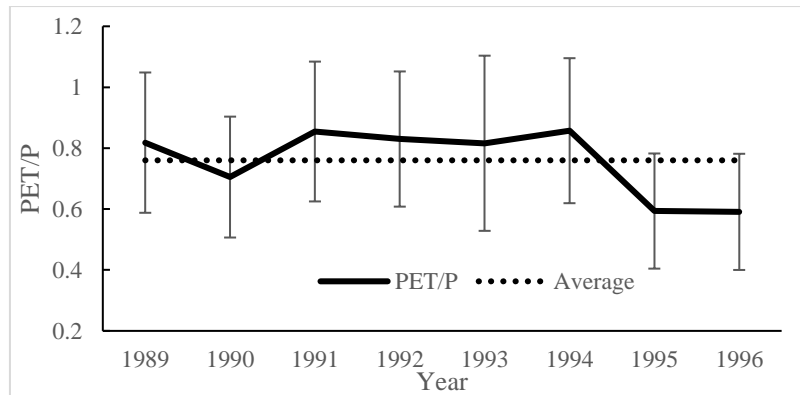

Figure S4 Temporal variation of the annual dryness index (PET/P) in the study watersheds. Bars represent one standard deviation among study watersheds from 1989 to 1996. The dotted line represents the average PET/P across the study period for all watersheds.

Table S1 Watershed number, hydrometric station number, watershed name, and area.

| Watershed No. | Station Number | Watershed Name                            | Area (km <sup>2</sup> ) |
|---------------|----------------|-------------------------------------------|-------------------------|
| 1             | 08LG016        | Pennask Creek Near Quilchena              | 85.8                    |
| 2             | 08LE077        | Corning Creek Near Squilax                | 23.4                    |
| 3             | 08NM134        | Camp Creek At Mouth Near Thirsk           | 35.5                    |
| 4             | 08NM240        | Two Forty Creek Near Penticton            | 5.1                     |
| 5             | 08NM242        | Dennis Creek Near 1780 Metre Contour      | 2.6                     |
| 6             | 08NL050        | Hedley Creek Near The Mouth               | 388.8                   |
| 7             | 08NL071        | Tulameen River Below Vuich Creek          | 253.4                   |
| 8             | 08NM171        | Vaseux Creek Above Solco Creek            | 118.4                   |
| 9             | 08LE108        | East Canoe Creek Above Dam                | 21.3                    |
| 10            | 08LB012        | Paul Creek At The Outlet Of Pinantan Lake | 68.9                    |
| 11            | 08LF081        | Ambusten Creek Near The Mouth             | 34.0                    |
| 12            | 08LF084        | Anderson Creek Above Diversions           | 37.3                    |
| 13            | 08LC040        | Vance Creek Below Deafies Creek           | 71.8                    |



|    |         |                                         |        |
|----|---------|-----------------------------------------|--------|
| 14 | 08LG008 | Spilus Creek Near Canford               | 767.8  |
| 15 | 08LE075 | Salmon River Above Salmon Lake          | 148.8  |
| 16 | 08NM174 | Whiteman Creek Above Bouleau Creek      | 109.6  |
| 17 | 08NE110 | Inonoaklin Creek Above Valley Creek     | 322.5  |
| 18 | 08LG064 | Beak Creek At The Mouth                 | 83.9   |
| 19 | 08NN015 | West Kettle River Near Mcculloch        | 301.2  |
| 20 | 08NM173 | Greata Creek Near The Mouth             | 43.5   |
| 21 | 08NN019 | Trapping Creek Near The Mouth           | 144.7  |
| 22 | 08NL036 | Whipsaw Creek Below Lamont Creek        | 186.7  |
| 23 | 08NM142 | Coldstream Creek Above Municipal Intake | 61.1   |
| 24 | 08LG066 | Chataway Creek Near The Mouth           | 36.5   |
| 25 | 08LG048 | Coldwater River Near Brookmere          | 321.8  |
| 26 | 08NM241 | Two Forty-One Creek Near Penticton      | 4.9    |
| 27 | 08NL024 | Tulameen River At Princeton             | 1780.0 |
| 28 | 08NL045 | Keremeos Below Wills Intake             | 181.0  |

## 2. Leaf area index (LAI)

Leaf area index (*LAI*) is defined as one-half of the total green leaf area per unit of horizontal ground surface area (Xiao et al., 2014). The Global Land Surface Satellite (GLASS) *LAI* was chosen for this study due to its high temporal (8-day) and spatial (0.05 degree, about 5 km) resolutions from July 1981 to December 2012 (Xiao et al., 2014). The GLASS *LAI* was derived from the Moderate-Resolution Imaging Spectroradiometer (MODIS) and Advanced High Resolution Radiometer (AVHRR) time-series reflectance data through general regression neural networks. From 1981 to 1999, the *LAI* values were generated from the AVHRR reflectance with the spatial resolution of 0.05 degree. From 2000 to 2012, the *LAI* values were derived from

MODIS land surface reflectance (MOD09A1) with the spatial resolution of 1 km. The GLASS *LAI* has been validated by extensive field *LAI* (Xiao et al., 2014).

In this study, the growing season (May to October) *LAI* from 1989 to 1996 was derived for each watershed. Two reviews on the relationship between forest cover changes and water yield clearly indicated that forest cover change is a dominant factor for hydrological variation (Li et al., 2017; Zhang et al., 2017). To minimize the effects of the possible difference in forest cover among the studied watershed on flow variables, the linear regression model was carried out between the *LAI* and annual mean flow for each watershed. The *LAI* is treated as an independent variable and annual mean flow is considered as a dependent variable. The null hypothesis is that there are no effects of *LAI* variations on annual mean flow. The P values of all regression models were higher than 0.05, indicating that the null hypothesis was accepted. Therefore, we assume the vegetation variations did not affect the flow variables in the period of 1989 to 1996 in the selected 28 watersheds.

### **3. Summaries of Kendall correlations between flow variables and topographic indices**

Table S2 Coefficients of the Kendall correlation test between the annual mean flow ( $Q_{mean}$ ) and topographic indices (TIs) from 1989 to 1996. The coefficients in color and in an italic style indicate statistical significance at  $p < 0.05$ . The bold TIs with “\*” are the sub-set of TIs identified by factor analysis (FA) for further analysis. TI acronyms are defined in Table 1.

| $Q_{mean}$           | 1989         | 1990   | 1991         | 1992         | 1993   | 1994   | 1995         | 1996   |
|----------------------|--------------|--------|--------------|--------------|--------|--------|--------------|--------|
| Area                 | 0.243        | 0.233  | <i>0.302</i> | 0.233        | 0.132  | 0.164  | <i>0.302</i> | 0.233  |
| <b>DDG*</b>          | 0.177        | 0.143  | 0.155        | 0.155        | 0.070  | 0.104  | 0.166        | 0.087  |
| DDGD                 | 0.009        | -0.078 | -0.084       | -0.041       | 0.066  | -0.003 | -0.022       | -0.066 |
| DEM                  | 0.106        | 0.053  | 0.090        | 0.127        | 0.016  | 0.048  | 0.058        | -0.011 |
| FLD                  | <i>0.307</i> | 0.254  | 0.259        | <i>0.307</i> | 0.196  | 0.206  | 0.259        | 0.190  |
| LAI                  | 0.042        | -0.032 | -0.026       | -0.021       | 0.026  | 0.111  | 0.026        | 0.063  |
| <b>LS*</b>           | 0.164        | 0.122  | 0.116        | 0.122        | 0.042  | 0.085  | 0.148        | 0.069  |
| <b>Openness*</b>     | 0.105        | 0.048  | 0.093        | 0.071        | 0.020  | 0.059  | 0.099        | 0.037  |
| <b>Perimeter*</b>    | 0.185        | 0.185  | <i>0.265</i> | 0.196        | 0.138  | 0.159  | 0.243        | 0.238  |
| <b>Relief*</b>       | 0.148        | 0.116  | 0.111        | 0.116        | 0.069  | 0.069  | 0.132        | 0.053  |
| Roundness            | 0.016        | 0.048  | -0.053       | -0.059       | 0.037  | -0.043 | 0.000        | -0.059 |
| <b>SCA*</b>          | -0.095       | -0.085 | -0.026       | -0.053       | -0.196 | -0.185 | -0.058       | -0.138 |
| <b>Slope*</b>        | 0.186        | 0.159  | 0.137        | 0.159        | 0.088  | 0.104  | 0.164        | 0.077  |
| Stream density       | -0.245       | -0.229 | -0.176       | -0.176       | -0.160 | -0.176 | -0.235       | -0.197 |
| Stream length        | 0.201        | 0.201  | 0.259        | <i>0.265</i> | 0.185  | 0.196  | 0.217        | 0.201  |
| <b>Surface area*</b> | 0.180        | 0.159  | 0.164        | 0.159        | 0.090  | 0.101  | 0.185        | 0.116  |
| <b>TCI*</b>          | 0.069        | 0.069  | 0.085        | 0.101        | 0.000  | 0.032  | 0.096        | -0.005 |
| Total                | -0.021       | -0.021 | 0.810        | -0.064       | -0.120 | -0.106 | 0.049        | -0.064 |
| TPI                  | 0.130        | 0.098  | 0.135        | 0.130        | -0.008 | 0.045  | 0.125        | 0.056  |
| <b>TRI*</b>          | 0.185        | 0.153  | 0.148        | 0.153        | 0.074  | 0.085  | 0.169        | 0.079  |
| TWI                  | -0.119       | -0.065 | -0.027       | -0.038       | -0.129 | -0.146 | -0.032       | -0.140 |
| <b>UCA*</b>          | -0.090       | -0.101 | -0.021       | -0.048       | -0.222 | -0.201 | -0.053       | -0.153 |
| Wetland %            | 0.084        | 0.109  | 0.116        | 0.064        | 0.122  | 0.032  | 0.141        | 0.122  |

Table S3 Coefficients of the Kendall correlation test between Q<sub>10</sub> and topographic indices (TIs) from 1989 to 1996. The coefficients in color and italic style indicate statistical significance p<0.05. The bold TIs with sign of “\*” are the sub-set of TIs identified by factor analysis (FA) to move forward with. TI acronyms are defined in Table 1.

| Q <sub>10</sub>      | 1989   | 1990   | 1991   | 1992   | 1993   | 1994   | 1995         | 1996   |
|----------------------|--------|--------|--------|--------|--------|--------|--------------|--------|
| Area                 | 0.175  | 0.146  | 0.199  | 0.170  | 0.101  | 0.138  | <i>0.273</i> | 0.199  |
| <b>DDG*</b>          | 0.160  | 0.138  | 0.129  | 0.155  | 0.020  | 0.081  | 0.180        | 0.090  |
| DDGD                 | -0.078 | -0.116 | -0.138 | -0.135 | 0.103  | -0.034 | -0.028       | -0.094 |
| DEM                  | 0.132  | 0.045  | 0.056  | 0.202  | -0.005 | 0.074  | 0.082        | 0.029  |
| FDL                  | 0.122  | 0.109  | 0.146  | 0.127  | 0.122  | 0.138  | 0.188        | 0.135  |
| LAI                  | 0.058  | -0.098 | -0.008 | 0.000  | 0.026  | 0.085  | 0.024        | 0.072  |
| <b>LS*</b>           | 0.159  | 0.114  | 0.082  | 0.127  | -0.011 | 0.069  | 0.151        | 0.066  |
| <b>Openness*</b>     | 0.088  | 0.051  | 0.074  | 0.091  | -0.020 | 0.048  | 0.113        | 0.045  |
| <b>Perimeter*</b>    | 0.243  | 0.183  | 0.225  | 0.207  | 0.127  | 0.185  | <i>0.310</i> | 0.236  |
| <b>Relief*</b>       | 0.153  | 0.119  | 0.098  | 0.133  | 0.016  | 0.074  | 0.156        | 0.050  |
| Roundness            | -0.118 | -0.013 | -0.035 | -0.161 | -0.016 | -0.107 | -0.062       | -0.094 |
| <b>SCA*</b>          | -0.037 | -0.045 | -0.050 | 0.021  | -0.206 | -0.138 | -0.024       | -0.125 |
| <b>Slope*</b>        | 0.181  | 0.151  | 0.113  | 0.165  | 0.038  | 0.104  | 0.173        | 0.074  |
| Stream density       | -0.165 | -0.163 | -0.142 | -0.107 | -0.075 | -0.101 | -0.174       | -0.158 |
| Stream length        | 0.175  | 0.156  | 0.177  | 0.191  | 0.143  | 0.190  | 0.230        | 0.177  |
| <b>Surface area*</b> | 0.185  | 0.167  | 0.140  | 0.164  | 0.048  | 0.106  | 0.209        | 0.114  |
| <b>TCI*</b>          | 0.074  | 0.067  | 0.061  | 0.107  | -0.043 | 0.027  | 0.088        | -0.008 |
| Total                | -0.070 | -0.035 | 0.007  | -0.064 | -0.106 | -0.106 | 0.064        | -0.021 |
| TPI                  | 0.104  | 0.074  | 0.112  | 0.104  | -0.050 | 0.029  | 0.128        | 0.064  |
| <b>TRI*</b>          | 0.180  | 0.146  | 0.114  | 0.159  | 0.021  | 0.090  | 0.183        | 0.077  |
| TWI                  | -0.124 | -0.067 | -0.078 | -0.076 | -0.189 | -0.135 | -0.046       | -0.165 |
| <b>UCA*</b>          | -0.053 | -0.072 | -0.056 | 0.005  | -0.233 | -0.153 | -0.029       | -0.140 |
| Wetland %            | 0.071  | 0.097  | 0.113  | 0.013  | 0.135  | 0.039  | 0.187        | 0.129  |

Table S4 Coefficients of the Kendall correlation test between Q<sub>25</sub> and topographic indices (TIs) from 1989 to 1996. The coefficients in color and italic style indicate statistical significance at p<0.05. The bold TIs with “\*” are the sub-set of TIs identified by factor analysis (FA) to move forward with. TI acronyms are defined in Table 1.

| Q <sub>25</sub>      | 1989                | 1990                | 1991                | 1992                | 1993   | 1994                | 1995                | 1996                |
|----------------------|---------------------|---------------------|---------------------|---------------------|--------|---------------------|---------------------|---------------------|
| Area                 | <i><b>0.294</b></i> | 0.255               | <i><b>0.347</b></i> | 0.234               | 0.167  | <i><b>0.340</b></i> | <i><b>0.372</b></i> | <i><b>0.435</b></i> |
| <b>DDG*</b>          | 0.228               | 0.229               | 0.248               | 0.136               | -0.048 | 0.175               | <i><b>0.280</b></i> | 0.239               |
| DDGD                 | -0.059              | -0.088              | -0.119              | -0.088              | 0.091  | 0.022               | 0.066               | 0.100               |
| DEM                  | 0.151               | 0.213               | 0.220               | 0.165               | -0.072 | 0.218               | 0.223               | 0.212               |
| FLD                  | 0.199               | 0.149               | 0.209               | 0.160               | 0.236  | 0.255               | <i><b>0.271</b></i> | <i><b>0.345</b></i> |
| LAI                  | 0.040               | 0.106               | 0.040               | -0.027              | -0.082 | 0.149               | 0.080               | 0.042               |
| <b>LS*</b>           | 0.209               | 0.229               | 0.215               | 0.117               | -0.088 | 0.143               | 0.223               | 0.196               |
| <b>Openness*</b>     | 0.164               | 0.190               | 0.204               | 0.074               | -0.088 | 0.179               | 0.225               | 0.213               |
| <b>Perimeter*</b>    | <i><b>0.342</b></i> | <i><b>0.319</b></i> | <i><b>0.416</b></i> | <i><b>0.293</b></i> | 0.173  | <i><b>0.387</b></i> | <i><b>0.426</b></i> | <i><b>0.408</b></i> |
| <b>Relief*</b>       | 0.215               | 0.202               | 0.209               | 0.122               | -0.056 | 0.133               | 0.239               | 0.180               |
| Roundness            | -0.158              | -0.196              | -0.222              | -0.183              | 0.021  | -0.260              | -0.220              | -0.206              |
| <b>SCA*</b>          | -0.008              | 0.016               | 0.072               | 0.053               | -0.231 | 0.005               | 0.059               | -0.058              |
| <b>Slope*</b>        | 0.236               | 0.226               | 0.222               | 0.149               | -0.039 | 0.165               | 0.259               | 0.220               |
| Stream density       | -0.077              | -0.091              | -0.061              | -0.059              | -0.062 | -0.027              | -0.027              | -0.043              |
| Stream length        | <i><b>0.283</b></i> | 0.261               | <i><b>0.305</b></i> | <i><b>0.266</b></i> | 0.252  | <i><b>0.355</b></i> | <i><b>0.319</b></i> | <i><b>0.350</b></i> |
| <b>Surface area*</b> | 0.241               | 0.223               | <i><b>0.262</b></i> | 0.165               | -0.013 | 0.196               | <i><b>0.293</b></i> | 0.244               |
| <b>TCI*</b>          | 0.083               | 0.128               | 0.173               | 0.091               | -0.099 | 0.128               | 0.182               | 0.112               |
| Total                | -0.021              | -0.007              | 0.134               | -0.021              | -0.148 | -0.092              | 0.064               | 0.092               |
| TPI                  | 0.149               | 0.174               | 0.234               | 0.099               | -0.107 | 0.141               | 0.232               | 0.173               |
| <b>TRI*</b>          | 0.230               | 0.218               | 0.236               | 0.149               | -0.040 | 0.159               | <i><b>0.266</b></i> | 0.207               |
| TWI                  | -0.148              | -0.122              | -0.003              | -0.054              | -0.160 | -0.124              | -0.070              | -0.092              |
| <b>UCA*</b>          | -0.003              | 0.011               | 0.077               | 0.048               | -0.247 | 0.000               | 0.053               | -0.048              |
| Wetland %            | 0.135               | 0.061               | 0.132               | 0.094               | 0.174  | 0.064               | 0.162               | 0.210               |

Table S5 Coefficients of the Kendall correlation test between Q<sub>50</sub> and topographic indices (TIs) from 1989 to 1996. The coefficients in color and italic style indicate statistical significance at p<0.05. The bold TIs with “\*” are the sub-set of TIs identified by factor analysis (FA) to move forward with. TI acronyms are defined in Table 1.

| Q <sub>50</sub>      | 1989                | 1990                | 1991                | 1992                | 1993                | 1994                 | 1995                | 1996                |
|----------------------|---------------------|---------------------|---------------------|---------------------|---------------------|----------------------|---------------------|---------------------|
| Area                 | <i><b>0.304</b></i> | <i><b>0.293</b></i> | <i><b>0.281</b></i> | <i><b>0.324</b></i> | <i><b>0.516</b></i> | <i><b>0.369</b></i>  | <i><b>0.305</b></i> | <i><b>0.329</b></i> |
| <b>DDG*</b>          | 0.235               | <i><b>0.291</b></i> | <i><b>0.307</b></i> | 0.225               | 0.277               | 0.225                | 0.216               | 0.239               |
| DDGD                 | 0.076               | -0.069              | -0.126              | -0.152              | 0.200               | 0.054                | 0.092               | -0.092              |
| DEM                  | 0.203               | 0.261               | <i><b>0.340</b></i> | 0.217               | 0.172               | 0.260                | 0.091               | 0.169               |
| FLD                  | <i><b>0.272</b></i> | 0.202               | 0.185               | 0.201               | <i><b>0.419</b></i> | <i><b>0.260</b></i>  | 0.262               | 0.185               |
| LAI                  | 0.053               | 0.059               | 0.035               | -0.024              | -0.048              | 0.070                | -0.064              | 0.094               |
| <b>LS*</b>           | 0.197               | <i><b>0.293</b></i> | <i><b>0.319</b></i> | 0.212               | 0.188               | 0.184                | 0.187               | 0.228               |
| <b>Openness *</b>    | 0.194               | 0.253               | <i><b>0.275</b></i> | 0.172               | 0.230               | 0.206                | 0.120               | 0.217               |
| <b>Perimeter*</b>    | <i><b>0.352</b></i> | <i><b>0.330</b></i> | <i><b>0.308</b></i> | <i><b>0.383</b></i> | <i><b>0.473</b></i> | <i><b>0.412</b></i>  | <i><b>0.326</b></i> | <i><b>0.361</b></i> |
| <b>Relief*</b>       | 0.203               | <i><b>0.277</b></i> | <i><b>0.292</b></i> | 0.195               | 0.199               | 0.157                | 0.176               | 0.212               |
| Roundness            | -0.178              | -0.194              | -0.203              | -0.192              | -0.158              | <i><b>-0.279</b></i> | -0.097              | -0.149              |
| <b>SCA*</b>          | 0.021               | 0.096               | 0.163               | 0.142               | 0.011               | 0.081                | -0.043              | 0.024               |
| <b>Slope*</b>        | 0.218               | 0.265               | <i><b>0.289</b></i> | 0.205               | 0.223               | 0.177                | 0.188               | 0.230               |
| Stream density       | -0.129              | -0.123              | -0.057              | -0.070              | 0.114               | 0.098                | -0.156              | -0.067              |
| Stream length        | 0.261               | 0.197               | 0.201               | <i><b>0.281</b></i> | <i><b>0.441</b></i> | <i><b>0.336</b></i>  | 0.214               | 0.238               |
| <b>Surface area*</b> | 0.245               | <i><b>0.277</b></i> | <i><b>0.287</b></i> | 0.249               | 0.253               | 0.201                | 0.219               | <i><b>0.265</b></i> |
| <b>TCI*</b>          | 0.145               | 0.198               | 0.242               | 0.191               | 0.184               | 0.188                | 0.113               | 0.159               |
| Total                | 0.021               | 0.120               | 0.162               | 0.092               | 0.205               | 0.106                | 0.134               | 0.120               |
| TPI                  | 0.163               | 0.243               | <i><b>0.280</b></i> | 0.231               | 0.219               | 0.237                | 0.142               | 0.242               |
| <b>TRI*</b>          | 0.229               | <i><b>0.282</b></i> | <i><b>0.287</b></i> | 0.222               | 0.231               | 0.168                | 0.193               | 0.228               |
| TWI                  | -0.016              | 0.027               | 0.019               | 0.052               | 0.049               | -0.050               | 0.046               | -0.060              |
| <b>UCA*</b>          | 0.027               | 0.122               | 0.190               | 0.142               | 0.027               | 0.103                | -0.043              | 0.035               |
| Wetland %            | 0.185               | 0.145               | 0.062               | 0.137               | <i><b>0.353</b></i> | 0.132                | 0.253               | 0.117               |

Table S6 Coefficients of the Kendall correlation test between  $Q_{75}$  and topographic indices (TIs) from 1989 to 1996. The coefficients in color and italic style indicate statistical significance at  $p < 0.05$ . The bold TIs with “\*” are the sub-set of TIs identified by factor analysis (FA) to move forward with. TI acronyms are defined in Table 1.

| $Q_{75}$             | 1989                | 1990                | 1991                | 1992                | 1993                | 1994                | 1995                | 1996                |
|----------------------|---------------------|---------------------|---------------------|---------------------|---------------------|---------------------|---------------------|---------------------|
| Area                 | 0.241               | <i><b>0.288</b></i> | <i><b>0.358</b></i> | <i><b>0.319</b></i> | <i><b>0.363</b></i> | <i><b>0.412</b></i> | <i><b>0.506</b></i> | <i><b>0.290</b></i> |
| <b>DDG*</b>          | 0.247               | 0.266               | <i><b>0.297</b></i> | 0.238               | 0.180               | 0.193               | <i><b>0.354</b></i> | 0.197               |
| DDGD                 | 0.048               | -0.057              | -0.118              | -0.121              | 0.006               | 0.032               | 0.144               | -0.051              |
| DEM                  | <i><b>0.295</b></i> | 0.207               | 0.250               | <i><b>0.254</b></i> | 0.202               | 0.190               | <i><b>0.349</b></i> | 0.166               |
| FLD                  | 0.187               | 0.218               | 0.218               | 0.211               | 0.234               | <i><b>0.369</b></i> | <i><b>0.398</b></i> | 0.204               |
| LAI                  | 0.165               | 0.008               | 0.067               | -0.092              | -0.013              | 0.060               | 0.089               | 0.070               |
| <b>LS*</b>           | 0.257               | <i><b>0.267</b></i> | <i><b>0.315</b></i> | 0.216               | 0.153               | 0.179               | <i><b>0.317</b></i> | 0.182               |
| <b>Openness*</b>     | 0.229               | 0.213               | <i><b>0.288</b></i> | 0.173               | 0.144               | 0.174               | <i><b>0.336</b></i> | 0.169               |
| <b>Perimeter*</b>    | <i><b>0.290</b></i> | <i><b>0.315</b></i> | <i><b>0.347</b></i> | <i><b>0.330</b></i> | <i><b>0.390</b></i> | <i><b>0.385</b></i> | <i><b>0.506</b></i> | <i><b>0.295</b></i> |
| <b>Relief*</b>       | 0.219               | 0.240               | <i><b>0.304</b></i> | 0.189               | 0.116               | 0.157               | <i><b>0.295</b></i> | 0.156               |
| Roundness            | -0.246              | -0.161              | -0.128              | -0.137              | -0.139              | -0.159              | -0.235              | -0.141              |
| <b>SCA*</b>          | 0.041               | 0.100               | 0.159               | 0.130               | 0.003               | 0.033               | 0.122               | -0.032              |
| <b>Slope*</b>        | 0.241               | 0.234               | 0.282               | 0.224               | 0.151               | 0.174               | <i><b>0.311</b></i> | 0.189               |
| Stream density       | -0.161              | -0.171              | -0.100              | -0.025              | 0.008               | -0.044              | 0.019               | -0.119              |
| Stream length        | 0.160               | 0.180               | 0.229               | 0.232               | <i><b>0.283</b></i> | <i><b>0.374</b></i> | <i><b>0.403</b></i> | 0.220               |
| <b>Surface area*</b> | 0.214               | <i><b>0.272</b></i> | <i><b>0.304</b></i> | 0.243               | 0.170               | 0.201               | <i><b>0.328</b></i> | 0.220               |
| <b>TCI*</b>          | 0.193               | 0.192               | 0.252               | 0.223               | 0.154               | 0.164               | <i><b>0.318</b></i> | 0.124               |
| Total                | 0.092               | 0.134               | 0.219               | 0.191               | 0.162               | 0.049               | 0.219               | 0.035               |
| TPI                  | 0.234               | 0.249               | <i><b>0.303</b></i> | <i><b>0.274</b></i> | 0.211               | 0.210               | <i><b>0.323</b></i> | 0.207               |
| <b>TRI*</b>          | 0.236               | 0.256               | <i><b>0.299</b></i> | 0.227               | 0.153               | 0.184               | <i><b>0.311</b></i> | 0.182               |
| TWI                  | 0.047               | 0.080               | 0.047               | 0.088               | 0.027               | 0.003               | 0.077               | -0.112              |
| <b>UCA*</b>          | 0.068               | 0.127               | 0.186               | 0.135               | 0.019               | 0.060               | 0.133               | -0.016              |
| Wetland %            | 0.099               | 0.160               | 0.147               | 0.135               | 0.193               | 0.161               | 0.201               | 0.111               |

Table S7 Coefficients of the Kendall correlation test between Q<sub>90</sub> and topographic indices (TIs) from 1989 to 1996. The coefficients in color and italic style indicate statistical significance at p<0.05. The bold TIs with “\*” are the sub-set of TIs identified by factor analysis (FA) to move forward with. TI acronyms are defined in Table 1.

| Q <sub>90</sub>      | 1989                | 1990                | 1991                | 1992                | 1993                | 1994                | 1995                | 1996   |
|----------------------|---------------------|---------------------|---------------------|---------------------|---------------------|---------------------|---------------------|--------|
| Area                 | 0.214               | <i><b>0.297</b></i> | <i><b>0.353</b></i> | <i><b>0.391</b></i> | <i><b>0.311</b></i> | <i><b>0.297</b></i> | <i><b>0.396</b></i> | 0.181  |
| <b>DDG*</b>          | <i><b>0.277</b></i> | <i><b>0.264</b></i> | 0.249               | <i><b>0.332</b></i> | 0.198               | 0.111               | <i><b>0.295</b></i> | 0.184  |
| DDGD                 | -0.042              | -0.102              | -0.127              | -0.097              | -0.045              | 0.058               | 0.078               | -0.163 |
| DEM                  | <i><b>0.296</b></i> | 0.189               | <i><b>0.277</b></i> | <i><b>0.402</b></i> | 0.257               | 0.187               | 0.220               | 0.100  |
| FLD                  | 0.126               | 0.227               | 0.245               | 0.233               | 0.203               | 0.264               | <i><b>0.302</b></i> | 0.154  |
| LAI                  | 0.225               | -0.022              | 0.073               | -0.041              | 0.024               | 0.016               | 0.159               | -0.003 |
| <b>LS*</b>           | <i><b>0.307</b></i> | <i><b>0.276</b></i> | 0.272               | <i><b>0.326</b></i> | 0.181               | 0.077               | <i><b>0.264</b></i> | 0.197  |
| <b>Openness *</b>    | <i><b>0.281</b></i> | 0.222               | 0.276               | <i><b>0.322</b></i> | 0.165               | 0.120               | <i><b>0.294</b></i> | 0.144  |
| <b>Perimeter*</b>    | <i><b>0.247</b></i> | <i><b>0.292</b></i> | <i><b>0.326</b></i> | <i><b>0.391</b></i> | <i><b>0.317</b></i> | 0.203               | <i><b>0.352</b></i> | 0.084  |
| <b>Relief*</b>       | <i><b>0.263</b></i> | <i><b>0.249</b></i> | 0.256               | <i><b>0.309</b></i> | 0.165               | 0.060               | <i><b>0.253</b></i> | 0.154  |
| Roundness            | -0.194              | -0.055              | -0.125              | -0.185              | -0.112              | -0.061              | -0.131              | 0.035  |
| <b>SCA*</b>          | 0.093               | 0.119               | 0.186               | 0.260               | 0.106               | 0.000               | 0.049               | -0.057 |
| <b>Slope*</b>        | <i><b>0.281</b></i> | 0.230               | 0.234               | <i><b>0.318</b></i> | 0.191               | 0.066               | <i><b>0.265</b></i> | 0.157  |
| Stream density       | -0.160              | -0.076              | -0.084              | 0.050               | -0.068              | 0.025               | -0.058              | -0.234 |
| Stream length        | 0.137               | 0.222               | 0.245               | 0.276               | 0.208               | 0.214               | 0.291               | 0.089  |
| <b>Surface area*</b> | 0.263               | <i><b>0.249</b></i> | 0.267               | <i><b>0.337</b></i> | 0.214               | 0.071               | <i><b>0.275</b></i> | 0.186  |
| <b>TCI*</b>          | 0.254               | 0.190               | 0.268               | <i><b>0.366</b></i> | 0.242               | 0.122               | 0.243               | 0.155  |
| Total                | 0.092               | 0.148               | 0.177               | 0.247               | 0.191               | 0.177               | 0.177               | 0.035  |
| TPI                  | <i><b>0.295</b></i> | <i><b>0.252</b></i> | <i><b>0.308</b></i> | <i><b>0.396</b></i> | 0.266               | 0.132               | <i><b>0.284</b></i> | 0.190  |
| <b>TRI*</b>          | <i><b>0.274</b></i> | 0.238               | 0.256               | <i><b>0.320</b></i> | 0.198               | 0.055               | <i><b>0.258</b></i> | 0.170  |
| TWI                  | 0.034               | 0.058               | 0.121               | 0.204               | 0.124               | 0.045               | 0.042               | -0.036 |
| <b>UCA*</b>          | 0.121               | 0.146               | 0.213               | <i><b>0.282</b></i> | 0.111               | 0.016               | 0.066               | -0.051 |
| Wetland %            | -0.013              | 0.122               | 0.088               | 0.116               | 0.161               | 0.197               | 0.217               | 0.000  |



Table S8 Coefficients of the Kendall correlation test between Q<sub>100</sub> and topographic indices (TIs) from 1989 to 1996. The coefficients in color and italic style indicate statistical significance at 0.05. The bold TIs with “\*” are the sub-set of TIs identified by factor analysis (FA) to move forward with. TI acronyms are defined in Table 1.

| Q <sub>100</sub>     | 1989          | 1990          | 1991          | 1992          | 1993          | 1994          | 1995          | 1996          |
|----------------------|---------------|---------------|---------------|---------------|---------------|---------------|---------------|---------------|
| Area                 | <i>0.763</i>  | <i>0.804</i>  | <i>0.774</i>  | <i>0.789</i>  | <i>0.837</i>  | <i>0.797</i>  | <i>0.721</i>  | <i>0.793</i>  |
| <b>DDG*</b>          | <i>0.459</i>  | <i>0.402</i>  | <i>0.397</i>  | <i>0.437</i>  | <i>0.445</i>  | <i>0.371</i>  | <i>0.399</i>  | <i>0.462</i>  |
| DDGD                 | 0.179         | 0.162         | 0.134         | 0.135         | 0.170         | 0.190         | 0.250         | 0.160         |
| DEM                  | <i>0.443</i>  | <i>0.464</i>  | <i>0.409</i>  | <i>0.504</i>  | <i>0.394</i>  | <i>0.355</i>  | <i>0.336</i>  | <i>0.449</i>  |
| FLD                  | <i>0.612</i>  | <i>0.623</i>  | <i>0.597</i>  | <i>0.627</i>  | <i>0.627</i>  | <i>0.602</i>  | <i>0.580</i>  | <i>0.605</i>  |
| LAI                  | 0.146         | 0.069         | 0.044         | 0.050         | 0.078         | 0.063         | 0.201         | 0.111         |
| <b>LS*</b>           | <i>0.382</i>  | <i>0.349</i>  | <i>0.332</i>  | <i>0.358</i>  | <i>0.338</i>  | <i>0.269</i>  | <i>0.308</i>  | <i>0.366</i>  |
| <b>Openness*</b>     | <i>0.435</i>  | <i>0.411</i>  | <i>0.384</i>  | <i>0.434</i>  | <i>0.430</i>  | <i>0.383</i>  | <i>0.399</i>  | <i>0.465</i>  |
| <b>Perimeter*</b>    | <i>0.707</i>  | <i>0.684</i>  | <i>0.702</i>  | <i>0.699</i>  | <i>0.710</i>  | <i>0.711</i>  | <i>0.659</i>  | <i>0.660</i>  |
| <b>Relief*</b>       | <i>0.354</i>  | <i>0.332</i>  | <i>0.315</i>  | <i>0.358</i>  | <i>0.349</i>  | <i>0.275</i>  | <i>0.308</i>  | <i>0.349</i>  |
| Roundness            | <i>-0.403</i> | <i>-0.297</i> | <i>-0.341</i> | <i>-0.351</i> | <i>-0.320</i> | <i>-0.296</i> | <i>-0.346</i> | <i>-0.336</i> |
| <b>SCA*</b>          | 0.202         | 0.244         | 0.249         | 0.274         | 0.189         | 0.183         | 0.127         | 0.227         |
| <b>Slope*</b>        | <i>0.378</i>  | <i>0.356</i>  | <i>0.327</i>  | <i>0.391</i>  | <i>0.379</i>  | <i>0.300</i>  | <i>0.322</i>  | <i>0.382</i>  |
| Stream density       | 0.068         | 0.127         | 0.095         | 0.180         | 0.120         | <i>0.176</i>  | <i>0.128</i>  | 0.126         |
| Stream length        | <i>0.578</i>  | <i>0.618</i>  | <i>0.575</i>  | <i>0.643</i>  | <i>0.643</i>  | <i>0.625</i>  | <i>0.540</i>  | <i>0.593</i>  |
| <b>Surface area*</b> | <i>0.393</i>  | <i>0.365</i>  | <i>0.365</i>  | <i>0.408</i>  | <i>0.410</i>  | <i>0.327</i>  | <i>0.348</i>  | <i>0.410</i>  |
| <b>TCI*</b>          | <i>0.361</i>  | <i>0.351</i>  | <i>0.353</i>  | <i>0.408</i>  | <i>0.360</i>  | <i>0.291</i>  | <i>0.333</i>  | <i>0.393</i>  |
| Total                | 0.276         | 0.290         | <i>0.318</i>  | 0.261         | 0.276         | <i>0.318</i>  | 0.304         | 0.261         |
| TPI                  | <i>0.411</i>  | <i>0.375</i>  | <i>0.414</i>  | <i>0.424</i>  | <i>0.395</i>  | <i>0.331</i>  | <i>0.378</i>  | <i>0.440</i>  |
| <b>TRI*</b>          | <i>0.370</i>  | <i>0.354</i>  | <i>0.348</i>  | <i>0.386</i>  | <i>0.383</i>  | <i>0.298</i>  | <i>0.325</i>  | <i>0.383</i>  |
| TWI                  | 0.114         | 0.118         | 0.147         | 0.157         | 0.096         | 0.091         | 0.060         | 0.130         |
| <b>UCA*</b>          | 0.230         | 0.272         | <i>0.271</i>  | <i>0.297</i>  | 0.211         | 0.206         | 0.150         | 0.250         |
| Wetland %            | 0.242         | 0.217         | 0.255         | 0.201         | 0.256         | 0.331         | 0.350         | 0.172         |

#### 4. An example of the daily flows in the Tulameen River in 1992

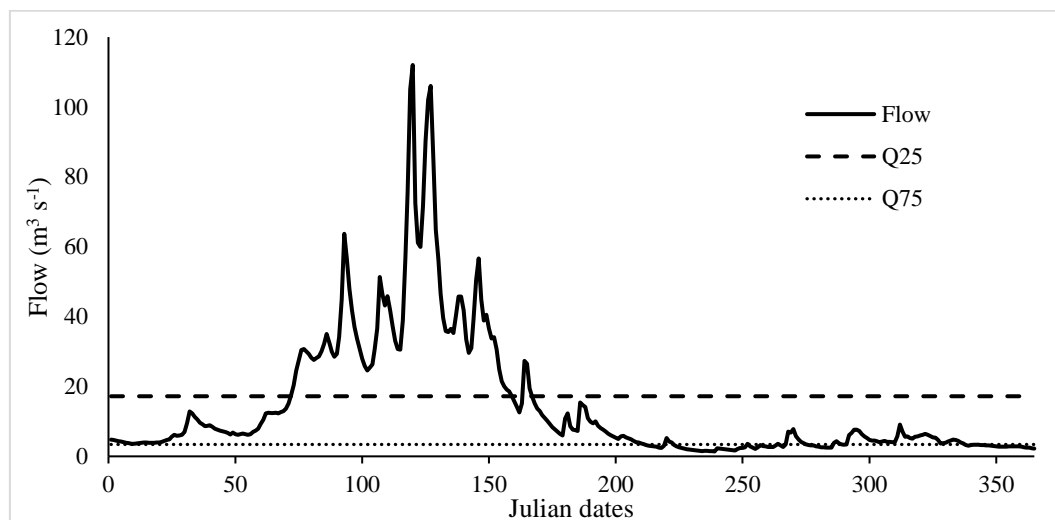

Figure S5 Daily streamflow,  $Q_{25\%}$ , and  $Q_{75\%}$  of the Tulameen River in 1992.

#### 5. Linear regression models between flow variables and the sub-set of TIs from FA

The null hypothesis of the linear regression models in this study is that the TIs have no effect on the flow variables, namely, the coefficients of the linear regression models are equal to zero. As shown in the model summaries in the following sections, the P values of all regression models are  $<0.01$ , indicating the null hypothesis was rejected for the models. In addition, the  $R^2$  values are around 0.5, revealing that the selected TIs can be used to explain flow regime component variations (Table S9).

Table S9 The coefficients of determination ( $R^2$ ) of regression models between flow variables and sub-set of TIs in the period of 1989 to 1996. P values of all models are  $<0.01$ .

| $R^2$ | Q <sub>50</sub> | Q <sub>75</sub> | Q <sub>90</sub> | Q <sub>100</sub> |
|-------|-----------------|-----------------|-----------------|------------------|
| 1989  | 0.422           | 0.732           | 0.726           | 0.532            |
| 1990  | 0.773           | 0.742           | 0.595           | 0.591            |
| 1991  | 0.704           | 0.808           | 0.696           | 0.546            |
| 1992  | 0.849           | 0.730           | 0.628           | 0.592            |
| 1993  | 0.745           | 0.723           | 0.784           | 0.479            |
| 1994  | 0.751           | 0.530           | 0.242           | 0.447            |
| 1995  | 0.883           | 0.861           | 0.753           | 0.611            |
| 1996  | 0.752           | 0.661           | 0.474           | 0.612            |

## 5.1. Model summaries of Q<sub>75%</sub> and TIs from 1989 to 1996

### 5.1.1. Year 1989

```
lm(formula = Q75_1989 ~ perimeter + UCA + DDG + LS + OPENNESS + SCA
+ slope + TRI, data = TI)
```

Residuals:

```
      Min          1Q      Median          3Q          Max
-0.125094 -0.025652 -0.003529  0.045415  0.080343
```

Coefficients:

```
      Estimate Std. Error t value Pr(>|t|)
(Intercept)  4.041e-01  1.475e-01  2.740  0.01302 *
perimeter    1.101e-06  4.018e-07  2.740  0.01301 *
UCA          -1.988e-05  9.138e-06  -2.176  0.04242 *
DDG          -4.992e+00  1.767e+00  -2.825  0.01082 *
LS           1.315e-01  6.055e-02  2.173  0.04267 *
OPENNESS    -3.657e+00  2.091e+00  -1.749  0.09639 .
SCA          5.228e-04  2.514e-04  2.079  0.05139 .
Slope       -1.245e+01  4.910e+00  -2.535  0.02018 *
TRI          5.797e-01  1.935e-01  2.997  0.00742 **
```

---

Signif. codes: 0 '\*\*\*' 0.001 '\*\*' 0.01 '\*' 0.05 '.' 0.1 ' ' 1

Residual standard error: 0.06504 on 19 degrees of freedom  
**Multiple R-squared: 0.7321**, Adjusted R-squared: 0.6193  
 F-statistic: 6.49 on 8 and 19 DF, **p-value: 0.0004036**

### 5.1.2. Year 1990

```
lm(formula = Q75_1990 ~ perimeter + UCA + DDG + LS + OPENNESS + SCA
+ Slope + TRI, data = TI)
```

Residuals:

|  | Min       | 1Q        | Median    | 3Q       | Max      |
|--|-----------|-----------|-----------|----------|----------|
|  | -0.090350 | -0.025522 | -0.001465 | 0.026552 | 0.117112 |

Coefficients:

|             | Estimate   | Std. Error | t value | Pr(> t )     |
|-------------|------------|------------|---------|--------------|
| (Intercept) | 4.388e-01  | 1.124e-01  | 3.903   | 0.000956 *** |
| perimeter   | 7.024e-07  | 3.062e-07  | 2.293   | 0.033396 *   |
| UCA         | -1.118e-05 | 6.964e-06  | -1.606  | 0.124833     |
| DDG         | -3.576e+00 | 1.347e+00  | -2.655  | 0.015638 *   |
| LS          | 1.154e-01  | 4.615e-02  | 2.500   | 0.021739 *   |
| OPENNESS    | -4.101e+00 | 1.594e+00  | -2.573  | 0.018609 *   |
| SCA         | 3.036e-04  | 1.916e-04  | 1.584   | 0.129652     |
| Slope       | -1.291e+01 | 3.742e+00  | -3.450  | 0.002685 **  |
| TRI         | 5.525e-01  | 1.474e-01  | 3.747   | 0.001364 **  |

---

Signif. codes: 0 '\*\*\*' 0.001 '\*\*' 0.01 '\*' 0.05 '.' 0.1 ' ' 1  
 Residual standard error: 0.04957 on 19 degrees of freedom  
**Multiple R-squared: 0.7415**, Adjusted R-squared: 0.6326  
 F-statistic: 6.812 on 8 and 19 DF, **p-value: 0.0002975**

### 5.1.3. Year 1991

Call:

```
lm(formula = Q75_1991 ~ perimeter + DDG + LS + OPENNESS + SCA + Slope
+ SA + TCI, data = TI)
```

Residuals:

|  | Min      | 1Q       | Median   | 3Q      | Max     |
|--|----------|----------|----------|---------|---------|
|  | -0.09115 | -0.04278 | -0.01246 | 0.03050 | 0.13767 |

Coefficients:

|  | Estimate | Std. Error | t value | Pr(> t ) |
|--|----------|------------|---------|----------|
|--|----------|------------|---------|----------|

|             |            |           |        |         |    |
|-------------|------------|-----------|--------|---------|----|
| (Intercept) | 7.047e-01  | 2.131e-01 | 3.307  | 0.00370 | ** |
| perimeter   | 1.188e-06  | 4.282e-07 | 2.773  | 0.01210 | *  |
| DDG         | -6.093e+00 | 1.782e+00 | -3.420 | 0.00287 | ** |
| LS          | 1.205e-01  | 5.858e-02 | 2.056  | 0.05376 | .  |
| OPENNESS    | -7.381e+00 | 2.269e+00 | -3.253 | 0.00419 | ** |
| SCA         | -4.018e-05 | 1.418e-05 | -2.834 | 0.01061 | *  |
| Slope       | -7.058e+00 | 3.623e+00 | -1.948 | 0.06629 | .  |
| SA          | 2.334e-02  | 6.181e-03 | 3.776  | 0.00128 | ** |
| TCI         | 1.953e-01  | 1.038e-01 | 1.881  | 0.07536 | .  |

---  
 Signif. codes: 0 '\*\*\*' 0.001 '\*\*' 0.01 '\*' 0.05 '.' 0.1 ' ' 1  
 Residual standard error: 0.06931 on 19 degrees of freedom  
**Multiple R-squared: 0.8075**, Adjusted R-squared: 0.7264  
 F-statistic: 9.962 on 8 and 19 DF, **p-value: 2.26e-05**

#### 5.1.4. Year 1992

Call:  
 lm(formula = Q75\_1992 ~ perimeter + UCA + DDG + OPENNESS + SA + TCI,  
 data = TI)

Residuals:

| Min       | 1Q        | Median    | 3Q       | Max      |
|-----------|-----------|-----------|----------|----------|
| -0.072164 | -0.023630 | -0.008224 | 0.032042 | 0.066133 |

Coefficients:

|             | Estimate   | Std. Error | t value | Pr(> t ) |     |
|-------------|------------|------------|---------|----------|-----|
| (Intercept) | 1.684e-01  | 7.076e-02  | 2.379   | 0.026912 | *   |
| perimeter   | 5.081e-07  | 2.320e-07  | 2.190   | 0.039931 | *   |
| UCA         | -8.746e-07 | 3.175e-07  | -2.755  | 0.011872 | *   |
| DDG         | -1.256e+00 | 9.953e-01  | -1.262  | 0.220952 |     |
| OPENNESS    | -6.150e+00 | 1.325e+00  | -4.642  | 0.000140 | *** |
| SA          | 9.478e-03  | 2.404e-03  | 3.942   | 0.000746 | *** |
| TCI         | 1.784e-01  | 6.474e-02  | 2.756   | 0.011834 | *   |

---  
 Signif. codes: 0 '\*\*\*' 0.001 '\*\*' 0.01 '\*' 0.05 '.' 0.1 ' ' 1  
 Residual standard error: 0.04373 on 21 degrees of freedom  
**Multiple R-squared: 0.73**, Adjusted R-squared: 0.6529  
 F-statistic: 9.464 on 6 and 21 DF, **p-value: 4.366e-05**

### 5.1.5. Year 1993

```
Call:
lm(formula = Q75_1993 ~ perimeter + UCA + DDG + OPENNESS + SA + TCI,
    data = TI)
```

```
Residuals:
    Min       1Q   Median       3Q      Max
-0.077354 -0.026997 -0.002669  0.019380  0.108517
```

```
Coefficients:
            Estimate Std. Error t value Pr(>|t|)
(Intercept)  2.166e-01  7.313e-02   2.962  0.00744 **
perimeter    7.388e-07  2.397e-07   3.082  0.00565 **
UCA          -1.028e-06  3.281e-07  -3.133  0.00503 **
DDG          -1.647e+00  1.029e+00  -1.601  0.12423
OPENNESS     -5.387e+00  1.369e+00  -3.934  0.00076 ***
SA            9.071e-03  2.485e-03   3.650  0.00149 **
TCI           1.680e-01  6.690e-02   2.511  0.02029 *
```

```
---
Signif. codes:  0 '***' 0.001 '**' 0.01 '*' 0.05 '.' 0.1 ' ' 1
Residual standard error: 0.04519 on 21 degrees of freedom
Multiple R-squared:  0.7231, Adjusted R-squared:  0.644
F-statistic: 9.142 on 6 and 21 DF, p-value: 5.592e-05
```

### 5.1.6. Year 1994

```
Call:
lm(formula = Q75_1994 ~ perimeter + DDG + OPENNESS + Relief + SCA +
    TCI, data = TI)
```

```
Residuals:
    Min       1Q   Median       3Q      Max
-0.058751 -0.015446 -0.004067  0.012854  0.084238
```

```
Coefficients:
            Estimate Std. Error t value Pr(>|t|)
(Intercept)  7.906e-02  3.805e-02   2.078  0.05019 .
perimeter    6.250e-07  1.728e-07   3.616  0.00162 **
DDG          -1.438e+00  7.646e-01  -1.880  0.07403 .
OPENNESS     -2.265e+00  1.099e+00  -2.060  0.05197 .
Relief       5.045e-03  1.916e-03   2.633  0.01554 *
SCA          -1.953e-05  6.957e-06  -2.807  0.01055 *
TCI           1.199e-01  5.097e-02   2.353  0.02845 *
```

---

Signif. codes: 0 '\*\*\*' 0.001 '\*\*' 0.01 '\*' 0.05 '.' 0.1 ' ' 1

Residual standard error: 0.03495 on 21 degrees of freedom  
**Multiple R-squared: 0.5304**, Adjusted R-squared: 0.3963  
F-statistic: 3.954 on 6 and 21 DF, **p-value: 0.008411**

### 5.1.7. Year 1995

Call:

```
lm(formula = Q75_1995 ~ perimeter + CA + DDG + LS + OPENNESS + Relief +  
  SCA + Slope + SA + TCI, data = TI)
```

Residuals:

| Min       | 1Q        | Median    | 3Q       | Max      |
|-----------|-----------|-----------|----------|----------|
| -0.068352 | -0.017378 | -0.004925 | 0.020059 | 0.068770 |

Coefficients:

|             | Estimate   | Std. Error | t value | Pr(> t ) |     |
|-------------|------------|------------|---------|----------|-----|
| (Intercept) | 2.836e-01  | 1.294e-01  | 2.191   | 0.04265  | *   |
| perimeter   | 1.121e-06  | 2.688e-07  | 4.171   | 0.00064  | *** |
| CA          | -7.583e-06 | 5.366e-06  | -1.413  | 0.17564  |     |
| DDG         | -3.297e+00 | 1.056e+00  | -3.122  | 0.00620  | **  |
| LS          | 5.238e-02  | 3.792e-02  | 1.381   | 0.18507  |     |
| OPENNESS    | -3.882e+00 | 1.334e+00  | -2.911  | 0.00974  | **  |
| Relief      | 9.861e-03  | 5.153e-03  | 1.914   | 0.07265  | .   |
| SCA         | 1.656e-04  | 1.469e-04  | 1.127   | 0.27531  |     |
| Slope       | -4.996e+00 | 2.387e+00  | -2.093  | 0.05161  | .   |
| SA          | 7.695e-03  | 4.033e-03  | 1.908   | 0.07345  | .   |
| TCI         | 2.075e-01  | 6.326e-02  | 3.280   | 0.00441  | **  |

---

Signif. codes: 0 '\*\*\*' 0.001 '\*\*' 0.01 '\*' 0.05 '.' 0.1 ' ' 1

Residual standard error: 0.03869 on 17 degrees of freedom  
**Multiple R-squared: 0.8607**, Adjusted R-squared: 0.7788  
F-statistic: 10.51 on 10 and 17 DF, **p-value: 1.856e-05**

### 5.1.8. Year 1996

Call:

```
lm(formula = Q75_1996 ~ perimeter + UCA + DDG + LS + OPENNESS + SCA +  
  Slope + SA, data = TI)
```

Residuals:

|  | Min       | 1Q        | Median   | 3Q       | Max      |
|--|-----------|-----------|----------|----------|----------|
|  | -0.121446 | -0.044581 | 0.003683 | 0.043811 | 0.094746 |

Coefficients:

|             | Estimate   | Std. Error | t value | Pr(> t ) |    |
|-------------|------------|------------|---------|----------|----|
| (Intercept) | 6.946e-01  | 2.012e-01  | 3.452   | 0.00267  | ** |
| perimeter   | 6.104e-07  | 4.204e-07  | 1.452   | 0.16284  |    |
| UCA         | -1.553e-05 | 8.791e-06  | -1.766  | 0.09341  | .  |
| DDG         | -3.542e+00 | 1.762e+00  | -2.010  | 0.05879  | .  |
| LS          | 1.611e-01  | 6.068e-02  | 2.655   | 0.01564  | *  |
| OPENNESS    | -2.685e+00 | 2.084e+00  | -1.288  | 0.21309  |    |
| SCA         | 3.875e-04  | 2.407e-04  | 1.610   | 0.12391  |    |
| Slope       | -9.086e+00 | 3.743e+00  | -2.427  | 0.02532  | *  |
| SA          | 1.592e-02  | 5.740e-03  | 2.773   | 0.01212  | *  |

---

Signif. codes: 0 '\*\*\*' 0.001 '\*\*' 0.01 '\*' 0.05 '.' 0.1 ' ' 1

Residual standard error: 0.0647 on 19 degrees of freedom  
Multiple R-squared: 0.6608, Adjusted R-squared: 0.518  
F-statistic: 4.627 on 8 and 19 DF, p-value: 0.002916

## 5.2. Model summaries of Q<sub>90%</sub> and TIs from 1989 to 1996

### 5.2.1. Year 1989

Call:

```
lm(formula = Q90_1989 ~ perimeter + DDG + UCA + LS + OPENNESS + SCA +
+ TCI + TRI + Slope, data = TI)
```

Residuals:

|  | Min       | 1Q        | Median    | 3Q       | Max      |
|--|-----------|-----------|-----------|----------|----------|
|  | -0.078474 | -0.016268 | -0.004554 | 0.022733 | 0.076333 |

Coefficients:

|             | Estimate   | Std. Error | t value | Pr(> t ) |   |
|-------------|------------|------------|---------|----------|---|
| (Intercept) | 2.080e-01  | 1.132e-01  | 1.838   | 0.0826   | . |
| perimeter   | 7.996e-07  | 2.929e-07  | 2.730   | 0.0138   | * |
| DDG         | -3.236e+00 | 1.269e+00  | -2.550  | 0.0201   | * |
| UCA         | -9.240e-06 | 6.573e-06  | -1.406  | 0.1768   |   |
| LS          | 8.345e-02  | 4.389e-02  | 1.901   | 0.0734   | . |
| OPENNESS    | -3.479e+00 | 1.599e+00  | -2.175  | 0.0432   | * |
| SCA         | 2.323e-04  | 1.813e-04  | 1.281   | 0.2165   |   |
| TCI         | 9.223e-02  | 6.983e-02  | 1.321   | 0.2031   |   |



|       |            |           |        |          |
|-------|------------|-----------|--------|----------|
| TRI   | 3.339e-01  | 1.401e-01 | 2.383  | 0.0284 * |
| Slope | -7.156e+00 | 3.563e+00 | -2.008 | 0.0599 . |

---

Signif. codes: 0 '\*\*\*' 0.001 '\*\*' 0.01 '\*' 0.05 '.' 0.1 ' ' 1

Residual standard error: 0.04668 on 18 degrees of freedom  
**Multiple R-squared: 0.7256**, Adjusted R-squared: 0.5884  
 F-statistic: 5.289 on 9 and 18 DF, **p-value: 0.00133**

### 5.2.2. Year 1990

Call:

```
lm(formula = Q90_1990 ~ perimeter + DDG + LS + OPENNESS + Relief + Slope + SCA + TCI, data = TI)
```

Residuals:

| Min      | 1Q       | Median  | 3Q      | Max     |
|----------|----------|---------|---------|---------|
| -0.07654 | -0.02648 | 0.00316 | 0.01833 | 0.08014 |

Coefficients:

|             | Estimate   | Std. Error | t value | Pr(> t ) |    |
|-------------|------------|------------|---------|----------|----|
| (Intercept) | 2.568e-01  | 8.301e-02  | 3.094   | 0.00598  | ** |
| perimeter   | 5.978e-07  | 2.253e-07  | 2.653   | 0.01570  | *  |
| DDG         | -1.895e+00 | 1.048e+00  | -1.809  | 0.08628  | .  |
| LS          | 7.123e-02  | 3.775e-02  | 1.887   | 0.07456  | .  |
| OPENNESS    | -2.930e+00 | 1.413e+00  | -2.074  | 0.05188  | .  |
| Relief      | 1.311e-02  | 4.839e-03  | 2.710   | 0.01389  | *  |
| Slope       | -5.773e+00 | 2.188e+00  | -2.638  | 0.01620  | *  |
| SCA         | -1.834e-05 | 8.847e-06  | -2.073  | 0.05198  | .  |
| TCI         | 1.041e-01  | 6.694e-02  | 1.554   | 0.13658  | .  |

---

Signif. codes: 0 '\*\*\*' 0.001 '\*\*' 0.01 '\*' 0.05 '.' 0.1 ' ' 1

Residual standard error: 0.0433 on 19 degrees of freedom  
**Multiple R-squared: 0.5951**, Adjusted R-squared: 0.4245  
 F-statistic: 3.49 on 8 and 19 DF, **p-value: 0.01204**

### 5.2.3. Year 1991

Call:

```
lm(formula = Q90_1991 ~ perimeter + UCA + DDG + LS + OPENNESS + Slope + SCA + TCI, data = TI)
```

SA + TCI, data = TI)

Residuals:

| Min      | 1Q       | Median   | 3Q      | Max     |
|----------|----------|----------|---------|---------|
| -0.06639 | -0.02549 | -0.01733 | 0.02431 | 0.13212 |

Coefficients:

|             | Estimate   | Std. Error | t value | Pr(> t ) |    |
|-------------|------------|------------|---------|----------|----|
| (Intercept) | 5.270e-01  | 1.619e-01  | 3.254   | 0.00418  | ** |
| perimeter   | 7.530e-07  | 3.291e-07  | 2.288   | 0.03379  | *  |
| UCA         | -8.812e-07 | 3.934e-07  | -2.240  | 0.03726  | *  |
| DDG         | -4.624e+00 | 1.359e+00  | -3.403  | 0.00298  | ** |
| LS          | 1.259e-01  | 4.485e-02  | 2.806   | 0.01128  | *  |
| OPENNESS    | -3.722e+00 | 1.722e+00  | -2.162  | 0.04362  | *  |
| Slope       | -6.748e+00 | 2.766e+00  | -2.440  | 0.02468  | *  |
| SA          | 1.263e-02  | 4.702e-03  | 2.685   | 0.01465  | *  |
| TCI         | 1.473e-01  | 7.891e-02  | 1.867   | 0.07744  | .  |

---

Signif. codes: 0 '\*\*\*' 0.001 '\*\*' 0.01 '\*' 0.05 '.' 0.1 ' ' 1

Residual standard error: 0.05277 on 19 degrees of freedom

**Multiple R-squared: 0.6961**, Adjusted R-squared: 0.5681

F-statistic: 5.44 on 8 and 19 DF, **p-value: 0.001174**

## 5.2.4. Year 1992

Call:

```
lm(formula = Q90_1992 ~ perimeter + UCA + OPENNESS + Relief + TCI, data = TI)
```

Residuals:

| Min       | 1Q        | Median   | 3Q       | Max      |
|-----------|-----------|----------|----------|----------|
| -0.069945 | -0.021394 | 0.005658 | 0.024677 | 0.048767 |

Coefficients:

|             | Estimate   | Std. Error | t value | Pr(> t ) |    |
|-------------|------------|------------|---------|----------|----|
| (Intercept) | -4.919e-02 | 3.270e-02  | -1.504  | 0.14674  |    |
| perimeter   | 5.063e-07  | 1.600e-07  | 3.164   | 0.00450  | ** |
| UCA         | -6.914e-07 | 2.591e-07  | -2.669  | 0.01403  | *  |
| OPENNESS    | -3.909e+00 | 1.092e+00  | -3.578  | 0.00168  | ** |
| Relief      | 4.094e-03  | 1.708e-03  | 2.397   | 0.02544  | *  |
| TCI         | 1.675e-01  | 5.068e-02  | 3.306   | 0.00322  | ** |

---

Signif. codes: 0 '\*\*\*' 0.001 '\*\*' 0.01 '\*' 0.05 '.' 0.1 ' ' 1

Residual standard error: 0.03605 on 22 degrees of freedom

**Multiple R-squared: 0.6277,** Adjusted R-squared: 0.5431  
 F-statistic: 7.42 on 5 and 22 DF, **p-value: 0.0003281**

### 5.2.5. Year 1993

Call:  
 lm(formula = Q90\_1993 ~ perimeter + UCA + DDG + OPENNESS + SA + TCI,  
 data = TI)

Residuals:  

|  | Min       | 1Q        | Median    | 3Q       | Max      |
|--|-----------|-----------|-----------|----------|----------|
|  | -0.046550 | -0.017709 | -0.002745 | 0.014261 | 0.065882 |

Coefficients:  

|             | Estimate   | Std. Error | t value | Pr(> t )     |
|-------------|------------|------------|---------|--------------|
| (Intercept) | 1.507e-01  | 5.069e-02  | 2.974   | 0.007246 **  |
| perimeter   | 4.951e-07  | 1.662e-07  | 2.980   | 0.007145 **  |
| UCA         | -7.872e-07 | 2.274e-07  | -3.461  | 0.002337 **  |
| DDG         | -1.878e+00 | 7.129e-01  | -2.635  | 0.015490 *   |
| OPENNESS    | -4.433e+00 | 9.491e-01  | -4.671  | 0.000131 *** |
| SA          | 8.072e-03  | 1.722e-03  | 4.687   | 0.000126 *** |
| TCI         | 1.743e-01  | 4.637e-02  | 3.759   | 0.001156 **  |

---  
 signif. codes: 0 '\*\*\*' 0.001 '\*\*' 0.01 '\*' 0.05 '.' 0.1 ' ' 1

Residual standard error: 0.03132 on 21 degrees of freedom  
**Multiple R-squared: 0.7844,** Adjusted R-squared: 0.7228  
 F-statistic: 12.74 on 6 and 21 DF, **p-value: 4.668e-06**

### 5.2.6. Year 1994

Call:  
 lm(formula = Q90\_1994 ~ perimeter + Relief + SCA + TCI + TRI,  
 data = TI)

Residuals:  

|  | Min       | 1Q        | Median    | 3Q       | Max      |
|--|-----------|-----------|-----------|----------|----------|
|  | -0.064842 | -0.019059 | -0.000727 | 0.018120 | 0.075263 |

Coefficients:  

|  | Estimate | Std. Error | t value | Pr(> t ) |
|--|----------|------------|---------|----------|
|--|----------|------------|---------|----------|

|             |            |           |        |        |   |
|-------------|------------|-----------|--------|--------|---|
| (Intercept) | 6.933e-02  | 3.144e-02 | 2.205  | 0.0382 | * |
| perimeter   | 4.030e-07  | 1.854e-07 | 2.174  | 0.0408 | * |
| Relief      | 9.851e-03  | 4.722e-03 | 2.086  | 0.0488 | * |
| SCA         | -1.569e-05 | 8.023e-06 | -1.956 | 0.0633 | . |
| TCI         | 1.021e-01  | 5.377e-02 | 1.899  | 0.0707 | . |
| TRI         | -1.898e-01 | 8.418e-02 | -2.255 | 0.0345 | * |

---

Signif. codes: 0 '\*\*\*' 0.001 '\*\*' 0.01 '\*' 0.05 '.' 0.1 ' ' 1

Residual standard error: 0.03593 on 22 degrees of freedom  
**Multiple R-squared: 0.2424**, Adjusted R-squared: 0.0702  
 F-statistic: 1.408 on 5 and 22 DF, **p-value: 0.2603**

### 5.2.7. Year 1995

Call:

```
lm(formula = Q901995 ~ perimeter + DDG + OPENNESS + LS + Relief + SA
+
  SCA + TCI + TRI, data = TI)
```

Residuals:

|  | Min       | 1Q        | Median    | 3Q       | Max      |
|--|-----------|-----------|-----------|----------|----------|
|  | -0.047075 | -0.014922 | -0.001947 | 0.009717 | 0.054008 |

Coefficients:

|             | Estimate   | Std. Error | t value | Pr(> t ) |     |
|-------------|------------|------------|---------|----------|-----|
| (Intercept) | 3.206e-01  | 1.113e-01  | 2.881   | 0.00995  | **  |
| perimeter   | 3.711e-07  | 1.724e-07  | 2.153   | 0.04513  | *   |
| DDG         | -1.401e+00 | 6.919e-01  | -2.025  | 0.05798  | .   |
| OPENNESS    | -1.697e+00 | 9.187e-01  | -1.847  | 0.08127  | .   |
| LS          | 4.181e-02  | 2.554e-02  | 1.637   | 0.11906  |     |
| Relief      | 7.650e-03  | 3.702e-03  | 2.067   | 0.05347  | .   |
| SA          | 1.495e-02  | 4.928e-03  | 3.033   | 0.00715  | **  |
| SCA         | -3.265e-05 | 6.636e-06  | -4.920  | 0.00011  | *** |
| TCI         | 1.282e-01  | 4.439e-02  | 2.887   | 0.00981  | **  |
| TRI         | -4.051e-01 | 1.364e-01  | -2.971  | 0.00819  | **  |

---

Signif. codes: 0 '\*\*\*' 0.001 '\*\*' 0.01 '\*' 0.05 '.' 0.1 ' ' 1

Residual standard error: 0.02712 on 18 degrees of freedom  
**Multiple R-squared: 0.7525**, Adjusted R-squared: 0.6287  
 F-statistic: 6.08 on 9 and 18 DF, **p-value: 0.0005873**

### 5.2.8. Year 1996

Call:

```
lm(formula = Q901996 ~ UCA + DDG + LS + Slope + SA + SCA, data = TI)
```

Residuals:

| Min      | 1Q       | Median  | 3Q      | Max     |
|----------|----------|---------|---------|---------|
| -0.11897 | -0.02299 | 0.00902 | 0.03000 | 0.10227 |

Coefficients:

|             | Estimate   | Std. Error | t value | Pr(> t ) |     |
|-------------|------------|------------|---------|----------|-----|
| (Intercept) | 6.664e-01  | 1.674e-01  | 3.982   | 0.000679 | *** |
| UCA         | -1.061e-05 | 6.861e-06  | -1.547  | 0.136890 |     |
| DDG         | -3.372e+00 | 1.389e+00  | -2.428  | 0.024234 | *   |
| LS          | 1.636e-01  | 4.910e-02  | 3.331   | 0.003171 | **  |
| Slope       | -1.042e+01 | 3.068e+00  | -3.397  | 0.002720 | **  |
| SA          | 1.297e-02  | 4.401e-03  | 2.947   | 0.007703 | **  |
| SCA         | 2.726e-04  | 1.893e-04  | 1.441   | 0.164455 |     |

---

Signif. codes: 0 '\*\*\*' 0.001 '\*\*' 0.01 '\*' 0.05 '.' 0.1 ' ' 1

Residual standard error: 0.05639 on 21 degrees of freedom

Multiple R-squared: 0.4737, Adjusted R-squared: 0.3233

F-statistic: 3.15 on 6 and 21 DF, p-value: 0.0231

### 5.3. Model summaries of $Q_{\min}$ and TIs from 1989 to 1996

#### 5.3.1. Year 1989

Call:

```
lm(formula = Q100_1989 ~ perimeter + UCA + LS + OPENNESS + Slope + T  
CI + TRI, data = TI)
```

Residuals:

| Min      | 1Q       | Median   | 3Q      | Max     |
|----------|----------|----------|---------|---------|
| -0.18565 | -0.07438 | -0.01677 | 0.02615 | 0.36914 |

Coefficients:

|             | Estimate   | Std. Error | t value | Pr(> t ) |    |
|-------------|------------|------------|---------|----------|----|
| (Intercept) | -9.081e-02 | 2.525e-01  | -0.360  | 0.72285  |    |
| perimeter   | 2.293e-06  | 8.540e-07  | 2.685   | 0.01422  | *  |
| UCA         | -3.759e-06 | 1.190e-06  | -3.159  | 0.00494  | ** |
| LS          | 2.498e-01  | 1.167e-01  | 2.141   | 0.04477  | *  |
| OPENNESS    | -7.908e+00 | 4.800e+00  | -1.647  | 0.11508  |    |

|       |            |           |        |           |
|-------|------------|-----------|--------|-----------|
| Slope | -5.891e+00 | 9.338e+00 | -0.631 | 0.53523   |
| TCI   | 5.620e-01  | 2.229e-01 | 2.521  | 0.02031 * |
| TRI   | -2.918e-01 | 4.134e-01 | -0.706 | 0.48840   |

---

Signif. codes: 0 '\*\*\*' 0.001 '\*\*' 0.01 '\*' 0.05 '.' 0.1 ' ' 1

Residual standard error: 0.1502 on 20 degrees of freedom  
**Multiple R-squared: 0.5318**, Adjusted R-squared: 0.3679  
 F-statistic: 3.245 on 7 and 20 DF, **p-value: 0.01811**

### 5.3.2. Year 1990

Call:

```
lm(formula = Q100_1990 ~ perimeter + LS + Relief + SCA + Slope +
    TCI + TRI, data = TI)
```

Residuals:

|  | Min      | 1Q       | Median   | 3Q      | Max     |
|--|----------|----------|----------|---------|---------|
|  | -0.19651 | -0.06463 | -0.01284 | 0.05362 | 0.30898 |

Coefficients:

|             | Estimate   | Std. Error | t value | Pr(> t )   |
|-------------|------------|------------|---------|------------|
| (Intercept) | 1.364e-01  | 1.929e-01  | 0.707   | 0.48753    |
| perimeter   | 2.202e-06  | 6.922e-07  | 3.181   | 0.00469 ** |
| LS          | 2.077e-01  | 9.248e-02  | 2.246   | 0.03618 *  |
| Relief      | 2.568e-02  | 1.585e-02  | 1.620   | 0.12087    |
| SCA         | -9.019e-05 | 2.712e-05  | -3.325  | 0.00337 ** |
| Slope       | -9.902e+00 | 7.292e+00  | -1.358  | 0.18959    |
| TCI         | 4.505e-01  | 1.825e-01  | 2.469   | 0.02270 *  |
| TRI         | -5.804e-01 | 3.909e-01  | -1.485  | 0.15315    |

---

Signif. codes: 0 '\*\*\*' 0.001 '\*\*' 0.01 '\*' 0.05 '.' 0.1 ' ' 1

Residual standard error: 0.1171 on 20 degrees of freedom  
**Multiple R-squared: 0.5912**, Adjusted R-squared: 0.4481  
 F-statistic: 4.131 on 7 and 20 DF, **p-value: 0.005824**

### 5.3.3. Year 1991

Call:

```
lm(formula = Q100_1991 ~ perimeter + UCA + LS + OPENNESS + Slope + T
    CI,
    data = TI)
```

Residuals:

|  | Min      | 1Q       | Median   | 3Q      | Max     |
|--|----------|----------|----------|---------|---------|
|  | -0.21732 | -0.09049 | -0.01292 | 0.06602 | 0.45765 |

Coefficients:

|             | Estimate   | Std. Error | t value | Pr(> t )   |
|-------------|------------|------------|---------|------------|
| (Intercept) | 9.260e-02  | 2.443e-01  | 0.379   | 0.70849    |
| perimeter   | 1.897e-06  | 7.089e-07  | 2.676   | 0.01413 *  |
| UCA         | -3.606e-06 | 1.172e-06  | -3.078  | 0.00571 ** |
| LS          | 3.177e-01  | 1.196e-01  | 2.656   | 0.01479 *  |
| OPENNESS    | -8.519e+00 | 5.071e+00  | -1.680  | 0.10774    |
| Slope       | -1.607e+01 | 6.606e+00  | -2.433  | 0.02402 *  |
| TCI         | 5.999e-01  | 2.346e-01  | 2.557   | 0.01835 *  |

---

Signif. codes: 0 '\*\*\*' 0.001 '\*\*' 0.01 '\*' 0.05 '.' 0.1 ' ' 1  
Residual standard error: 0.1596 on 21 degrees of freedom  
**Multiple R-squared: 0.5461**, Adjusted R-squared: 0.4164  
F-statistic: 4.211 on 6 and 21 DF, **p-value: 0.006188**

### 5.3.4. Year 1992

Call:

lm(formula = Q1001992 ~ perimeter + UCA + LS + OPENNESS + Relief + TCI + TRI, data = TI)

Residuals:

|  | Min      | 1Q       | Median   | 3Q      | Max     |
|--|----------|----------|----------|---------|---------|
|  | -0.15365 | -0.05808 | -0.01990 | 0.03615 | 0.35119 |

Coefficients:

|             | Estimate   | Std. Error | t value | Pr(> t )     |
|-------------|------------|------------|---------|--------------|
| (Intercept) | -1.630e-01 | 1.212e-01  | -1.344  | 0.193958     |
| perimeter   | 2.378e-06  | 6.608e-07  | 3.598   | 0.001795 **  |
| UCA         | -4.022e-06 | 9.935e-07  | -4.049  | 0.000628 *** |
| LS          | 1.911e-01  | 8.783e-02  | 2.176   | 0.041703 *   |
| OPENNESS    | -5.909e+00 | 3.782e+00  | -1.562  | 0.133857     |
| Relief      | 1.962e-02  | 1.609e-02  | 1.220   | 0.236706     |
| TCI         | 6.249e-01  | 1.917e-01  | 3.260   | 0.003920 **  |
| TRI         | -7.871e-01 | 3.188e-01  | -2.469  | 0.022686 *   |

---

Signif. codes: 0 '\*\*\*' 0.001 '\*\*' 0.01 '\*' 0.05 '.' 0.1 ' ' 1

Residual standard error: 0.1184 on 20 degrees of freedom  
**Multiple R-squared: 0.5915**, Adjusted R-squared: 0.4485  
F-statistic: 4.137 on 7 and 20 DF, **p-value: 0.005781**

### 5.3.5. Year 1993

Call:

```
lm(formula = Q100_1993 ~ perimeter + LS + OPENNESS + SCA + Slope + TCI + TRI, data = TI)
```

Residuals:

| Min      | 1Q       | Median   | 3Q      | Max     |
|----------|----------|----------|---------|---------|
| -0.18066 | -0.04901 | -0.01714 | 0.02445 | 0.33990 |

Coefficients:

|             | Estimate   | Std. Error | t value | Pr(> t ) |
|-------------|------------|------------|---------|----------|
| (Intercept) | -1.987e-02 | 2.211e-01  | -0.090  | 0.9293   |
| perimeter   | 1.780e-06  | 7.388e-07  | 2.410   | 0.0257 * |
| LS          | 1.998e-01  | 1.011e-01  | 1.975   | 0.0622 . |
| OPENNESS    | -5.014e+00 | 4.190e+00  | -1.197  | 0.2454   |
| SCA         | -7.570e-05 | 2.861e-05  | -2.646  | 0.0155 * |
| Slope       | -5.853e+00 | 8.171e+00  | -0.716  | 0.4821   |
| TCI         | 4.005e-01  | 1.949e-01  | 2.055   | 0.0531 . |
| TRI         | -2.018e-01 | 3.617e-01  | -0.558  | 0.5830   |

---

Signif. codes: 0 '\*\*\*' 0.001 '\*\*' 0.01 '\*' 0.05 '.' 0.1 ' ' 1

Residual standard error: 0.1309 on 20 degrees of freedom  
**Multiple R-squared: 0.4789**, Adjusted R-squared: 0.2965  
F-statistic: 2.626 on 7 and 20 DF, **p-value: 0.04262**

### 5.3.6. Year 1994

Call:

```
lm(formula = Q100_1994 ~ perimeter + DDG + Relief + SCA + TCI + TRI, data = TI)
```

Residuals:

| Min      | 1Q       | Median   | 3Q      | Max     |
|----------|----------|----------|---------|---------|
| -0.07093 | -0.03417 | -0.01463 | 0.01993 | 0.20145 |

Coefficients:

|             | Estimate   | Std. Error | t value | Pr(> t ) |
|-------------|------------|------------|---------|----------|
| (Intercept) | -1.301e-01 | 6.604e-02  | -1.970  | 0.0621 . |
| perimeter   | 7.422e-07  | 3.536e-07  | 2.099   | 0.0481 * |
| DDG         | 2.603e+00  | 1.469e+00  | 1.771   | 0.0910 . |
| Relief      | 1.636e-02  | 8.687e-03  | 1.883   | 0.0736 . |
| SCA         | -4.026e-05 | 1.476e-05  | -2.727  | 0.0126 * |



|     |            |           |        |        |   |
|-----|------------|-----------|--------|--------|---|
| TCI | 2.487e-01  | 1.007e-01 | 2.470  | 0.0222 | * |
| TRI | -4.193e-01 | 1.630e-01 | -2.573 | 0.0177 | * |

---

Signif. codes: 0 '\*\*\*' 0.001 '\*\*' 0.01 '\*' 0.05 '.' 0.1 ' ' 1

Residual standard error: 0.06606 on 21 degrees of freedom  
**Multiple R-squared: 0.4473**, Adjusted R-squared: 0.2894  
 F-statistic: 2.833 on 6 and 21 DF, **p-value: 0.03515**

### 5.3.7. Year 1995

Call:

```
lm(formula = Q100_1995 ~ perimeter + LS + Relief + SCA + SA +
    TCI + TRI, data = TI)
```

Residuals:

|  | Min       | 1Q        | Median    | 3Q       | Max      |
|--|-----------|-----------|-----------|----------|----------|
|  | -0.117308 | -0.043482 | -0.001117 | 0.026868 | 0.214352 |

Coefficients:

|             | Estimate   | Std. Error | t value | Pr(> t )     |
|-------------|------------|------------|---------|--------------|
| (Intercept) | 4.670e-01  | 2.462e-01  | 1.897   | 0.072384 .   |
| perimeter   | 9.726e-07  | 4.495e-07  | 2.163   | 0.042790 *   |
| LS          | 1.554e-01  | 6.107e-02  | 2.544   | 0.019309 *   |
| Relief      | 1.693e-02  | 9.801e-03  | 1.727   | 0.099575 .   |
| SCA         | -7.817e-05 | 1.756e-05  | -4.452  | 0.000245 *** |
| SA          | 2.736e-02  | 1.202e-02  | 2.276   | 0.033967 *   |
| TCI         | 3.105e-01  | 1.124e-01  | 2.763   | 0.011997 *   |
| TRI         | -1.187e+00 | 3.371e-01  | -3.521  | 0.002148 **  |

---

Signif. codes: 0 '\*\*\*' 0.001 '\*\*' 0.01 '\*' 0.05 '.' 0.1 ' ' 1

Residual standard error: 0.07245 on 20 degrees of freedom  
**Multiple R-squared: 0.611**, Adjusted R-squared: 0.4748  
 F-statistic: 4.487 on 7 and 20 DF, **p-value: 0.003801**

### 5.3.8. Year 1996

Call:

```
lm(formula = Q100_1996 ~ perimeter + LS + Relief + SCA + Slope +
    TCI + TRI, data = TI)
```

Residuals:

|  | Min | 1Q | Median | 3Q | Max |
|--|-----|----|--------|----|-----|
|--|-----|----|--------|----|-----|

-0.171270 -0.063652 -0.001923 0.063921 0.309049

Coefficients:

|             | Estimate   | Std. Error | t value | Pr(> t ) |    |
|-------------|------------|------------|---------|----------|----|
| (Intercept) | 1.598e-01  | 1.881e-01  | 0.850   | 0.40556  |    |
| perimeter   | 1.933e-06  | 6.750e-07  | 2.863   | 0.00961  | ** |
| LS          | 2.289e-01  | 9.019e-02  | 2.538   | 0.01958  | *  |
| Relief      | 2.853e-02  | 1.546e-02  | 1.846   | 0.07977  | .  |
| SCA         | -9.564e-05 | 2.645e-05  | -3.616  | 0.00173  | ** |
| Slope       | -1.152e+01 | 7.111e+00  | -1.620  | 0.12087  |    |
| TCI         | 4.941e-01  | 1.780e-01  | 2.777   | 0.01164  | *  |
| TRI         | -6.087e-01 | 3.812e-01  | -1.597  | 0.12599  |    |

---

Signif. codes: 0 '\*\*\*' 0.001 '\*\*' 0.01 '\*' 0.05 '.' 0.1 ' ' 1

Residual standard error: 0.1143 on 20 degrees of freedom  
**Multiple R-squared: 0.6115**, Adjusted R-squared: 0.4755  
F-statistic: 4.497 on 7 and 20 DF, **p-value: 0.003756**

## Reference

- Li, Q., Wei, X., Zhang, M., Liu, W., Fan, H., Zhou, G. ... & Wang, Y. (2017). Forest cover change and water yield in large forested watersheds: A global synthetic assessment. *Ecohydrology*.
- Xiao, Z., Liang, S., Wang, J., Chen, P., Yin, X., Zhang, L. and Song, J., 2014. Use of general regression neural networks for generating the GLASS leaf area index product from time-series MODIS surface reflectance. *IEEE Transactions on Geoscience and Remote Sensing*, 52(1), pp.209-223.
- Zhang, M., Liu, N., Harper, R., Li, Q., Liu, K., Wei, X. ... & Liu, S. (2017). A global review on hydrological response to forest change across multiple spatial scales: importance of scale, climate, forest type and hydrological regime. *Journal of Hydrology*.
